# Supplementary material
Source: publisher site journal article supplement (http://e-cmh.org/upload/media/cmh-2020-0307-suppl7.pdf)
Supplement: Supplementary file 1 [file cmh-2020-0307-suppl7.pdf]

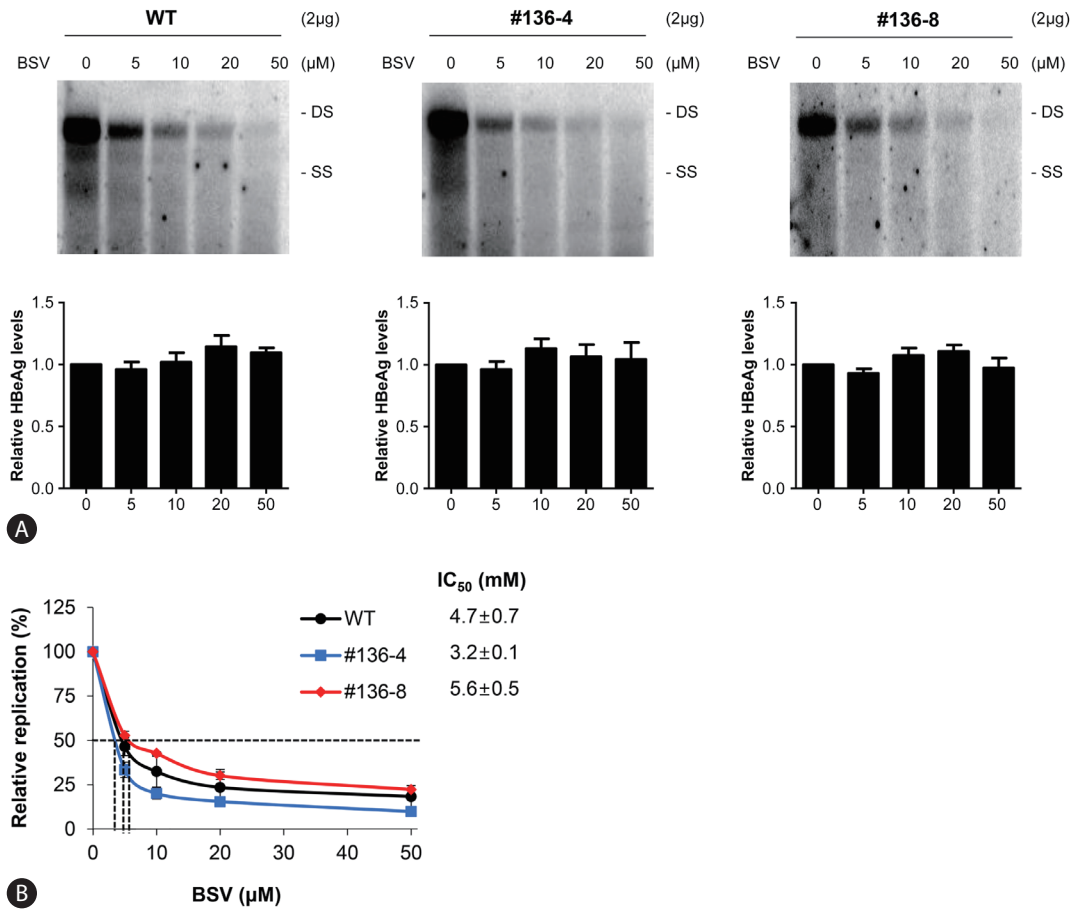

**Supplementary Figure 3.** *In vitro* besifovir susceptibility and determination of IC<sub>50</sub> of patient-derived RT mutants using Southern blot. (A) The besifovir susceptibility assay. Each panel shows representative autoradiograms from at least three independent experiments. The levels of secreted HBeAg were determined by ELISA to assess the transfection yield. (B) Determination of IC<sub>50</sub> values by Southern blot. The level of HBV replication without drug treatment was set at 100%. The IC<sub>50</sub> values were obtained by interpolation of the data from at least three independent experiments. WT, wild type; BSV, besifovir dipivoxil maleate; RT, reverse transcriptase; HBeAg, hepatitis B envelope antigen; ELISA, Enzyme-linked immunosorbent assay; HBV, hepatitis B virus.
